RETRACTION

## Retraction: Influence of pozzolanic addition on strength and microstructure of metakaolin-based concrete

The *PLOS One* Editors

The *PLOS One* Editors retract this article [1] due to concerns about potential manipulation of the publication process. These concerns call into question the validity and provenance of the reported results. We regret that the issues were not identified prior to the article's publication.

All authors did not agree with the retraction.

### Reference

1. Bansal M, Bansal M, Bahrami A, Krishan B, Garg R, Özkılıç YO, et al. RETRACTED: Influence of pozzolanic addition on strength and microstructure of metakaolin-based concrete. *PLoS One*. 2024;19(4):e0298761. <https://doi.org/10.1371/journal.pone.0298761> PMID: [38598491](https://pubmed.ncbi.nlm.nih.gov/38598491/)

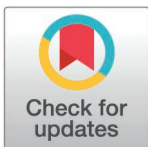

### OPEN ACCESS

**Citation:** The *PLOS One* Editors (2026) Retraction: Influence of pozzolanic addition on strength and microstructure of metakaolin-based concrete. *PLoS One* 21(4): e0346399. <https://doi.org/10.1371/journal.pone.0346399>

**Published:** April 7, 2026

**Copyright:** © 2026 The *PLOS One* Editors. This is an open access article distributed under the terms of the [Creative Commons Attribution License](https://creativecommons.org/licenses/by/4.0/), which permits unrestricted use, distribution, and reproduction in any medium, provided the original author and source are credited.
